# Supplementary material
Source: Research Square preprint supplement (doi:10.21203/rs.3.rs-9962098/v1)
Supplement: Supplementary file 1 [file 848122b2d7cf0997977f6c8a.xlsx]

## Sheet: Patient Population Grouping
Brain Injury	Heart Disease	Infection	Kidney Disease	Respiratory	Surgery	Other	Unknown
Alzheimer’s disease (AD)	Congestive heart failure (CHF)	patients positive cultures	patients with acute kidney injury (AKI)	ICU patients underwent invasive mechanical ventilation for ≥48 hours	patients with perforated peptic ulcers (PPU)	ICD-9 diagnosis of pelvic, acetabular or combined pelvic and acetabular fractures	Studies that did not specify a clinical condition, diagnosis, or population subgroup beyond stating use of MIMIC data
patients with spontaneous subarachnoid hemorrhage (SAH)	patients admitted to the CCU	patients with Sepsis-3		ICU patients who Were mechanically ventilated and Received at least one of five sedative/analgesic drugs	patients who underwent cardiac surgery	radiology reports
patients with non-trauma HBI	patients with acute myocardial infarction (AMI)	adults diagnosed with septic shock according to Sepsis-3 criteria were included		patients with suspected pneumonia	patients who underwent tracheostomy	critically ill patients with immunocompromise admitted to ICU
Patients who suffered from acute stroke	patients with acute myocardial infarction (AMI)	patients who met the sepsis criteria and used vasopressor		patients with APE		ICU patients with acute pancreatitis
patients with delirium	Patients with a diagnostic code indicating the presence of AF	patients meeting the Sepsis-3 criteria		Patients undergoingmechanical ventilation for more than 48 hours		patients with multiple visits
patients with a TBI diagnosis	Patients with and without patent ductus arteriosus (PDA)	Patients diagnosed with sepsis		Patients with asthma diagnosis (ICD-9 code)		Adult critical care admissions
Patients with acute stroke	Patients with Heart Failure (HF)	patients with sepsis		patients with ARDS		patients with labeled mortality outcomes
	coronary care unit (CCU) patients	patients with septic shock		patients with pneumonia		ECHO-NOTE2NUM database
	patients with heart failure			mechanically ventilated ICU patients		patients for severe hyperlactatemia
						patients with acute pancreatitis (AP)
