# Supplementary material
Source: Research Square preprint supplement (doi:10.21203/rs.3.rs-9962098/v1)
Supplement: Supplementary file 2 [file e1dfe2eb09904a2dcac6da8e.xlsx]

## Sheet: Sheet1
Regression	Survival analysis	Hypothesis testing	Machine learning	Deep learning	NLP (conditional)	Excluded (not analytical methods)
Logistic regression	Cox regression	t-test	Random Forest	Neural networks / MLP	BioBERT / ClinicalBERT	Performance metrics (F1, AUC, accuracy, PPV, NPV)
Linear regression	Kaplan–Meier	Wilcoxon / Mann–Whitney U / U-test	Decision Tree / CART	CNN	BigBird	Validation / tuning (cross-validation, grid search, fine-tuning)
LASSO / Ridge / Elastic net	Log-rank test	Kruskal–Wallis	XGBoost	RNN / LSTM / GRU / TCN	Large Language Models (e.g., LLaMA)	Explainability (SHAP, LIME)
Poisson regression	Restricted cubic splines (survival)	ANOVA (one-way)	LightGBM	AutoInt / NODE	TextCNN	Diagnostics (Hosmer–Lemeshow)
Negative binomial regression		Chi-squared / Fisher exact	CatBoost	GAN / EHR-M-GAN	CRF	Pipelines / bias mitigation / bootstrapping
Zero-inflated models		Kolmogorov–Smirnov	Gradient Boosting / AdaBoost / GBM	Reinforcement learning (DRL, POPCORN, DQN)		Charts / descriptive statistics
Robust regression		Shapiro–Wilk	SVM	ODE-RNN		None
Isotonic regression		Pearson / Spearman correlation	kNN
LOWESS / smoothing curves			Naive Bayes
			Explainable Boosting Machine (fEBM)
			PCA
			Clustering (k-means, LPA)
